# Supplementary material for: Experimenting with automated driving for technology or for the city? A matter of governance cultures
Source: Frontiers journal article supplement (doi:10.3389/frsc.2022.956853), 2022-08-03
Supplement: Data_Sheet_1.docx [file Data_Sheet_1.docx]

# Appendix: Overview of documents and press releases used for analysis

| **Storyline** | **Document type** | **Year** | **Description** | **Reference in text** |
| --- | --- | --- | --- | --- |
| Experimenting for technology | Government document | 2016 | Announcement of the Ministry of Finance and Economic Affairs of Baden-Württemberg concerning funding and implementation of test field for connected and automated driving in Baden-Württemberg | (Ministry of Finance and Economics Baden-Württemberg, 2016) |
| Government document | 2016 | Parliamentary request of the Christ-democratic party CDU arguing for a test field for connected and automated driving in Stuttgart. | (State Parliament Baden-Württemberg, 2016) |
| Government document | 2016 | Minutes from the city council discussion about the test field for automated and connected driving. | (City of Stuttgart, 2016) |
| Government document | 2019 | Handbook for regulatory sandboxes as innovation tools of the Federal Ministry for Economic Affairs and Energy. | (BMWi, 2019) |
| Press release | 2018 | Press release regarding the kick-off and completion of the test field for automated driving in Baden-Württemberg of the test field partner KIT (Karlsruhe institute for technology) | (KIT, 2018) |
| Press release | 2021 | Press release of the test field provider regarding the kick-off of their test field for automated driving in Baden-Württemberg. | (TAF-BW, 2021) |
| Press release | 2021 | Press release regarding the kick-off and completion of the test field for automated driving in Baden-Württemberg of the test field partner FZI as an independent research institute for data science | (FZI, 2021) |
| Experimenting for the city | Government document | 2016 | Coalition agreement between the Green party and CDU for their strategic orientation in the legislative session 2016 to 2021. | (State Ministry Baden-Württemberg, 2016) |
| Government document | 2018 | Local Transport Development Plan of the city of Stuttgart. | (City of Stuttgart, 2018a) |
| Government document | 2018 | Minutes from the plenary discussion in the city council of Stuttgart about the proposal of the Local Transport Development Plan. | (City of Stuttgart, 2018b) |
| Government document | 2019 | Document published by the Department for Strategic Planning and Sustainable Mobility of Stuttgart about sustainable urban mobility and its challenges and solutions in Stuttgart | (Daude, 2019) |
| Press release | 2016 | Press release of the Ministry of Transport Baden-Württemberg regarding the kick-off of the test field for automated driving in Baden-Württemberg. | (Ministry of Transport Baden-Württemberg, 2016) |
| Press release | 2018 | Press release of Mercedes Benz regarding the joint project SSB flex of moovel and SSB. | (Mercedes-Benz-Group-AG, 2018) |
| Study report | 2016 | Report about the results of the MEGAFON study dealing with autonomous car fleets in public transport. | (Friedrich and Hartl, 2016) |
