# Supplementary material for: Experimenting with automated driving for technology or for the city? A matter of governance cultures
Source: Frontiers journal article supplement (doi:10.3389/frsc.2022.956853), 2022-08-03
Supplement: Table_1.docx [file Table_1.docx]

# Table 1: List of interviews used for analysis.

| **No. interview** | **Description** | **Date** |
| --- | --- | --- |
| Interview 1 | Expert at Cluster Automotive Region Stuttgart at Economic Corporation of the Region of Stuttgart | December 12, 2018 |
| Interview 2 | Head of Bureau of Economic Development at City of Stuttgart | January 17, 2019 |
| Interview 3 | Expert at Ministry of Economics Baden-Württemberg, Division of Automobile and Production Industry | March 14, 2019 |
| Interview 4 | City Planner at Sustainable Mobility Department of the City of Stuttgart | March 15, 2019 |
| Interview 5 | Senior Director of Regional Development Association, Division Economics and Infrastructure | January 5, 2018 |
| Interview 6 | Expert at Automotive Technology Bosch | November 29, 2018 |
| Interview 7 | Expert of City Relations at Mobility Services Daimler | January 25, 2019 |
| Interview 8 | Expert at Ministry of Transport Baden-Württemberg, Division of Public Transport | November 16, 2018 |
| Interview 9 | Local politician from the Left Party (SOES LINKE PLuS) | July 2, 2018 |
| Interview 10 | Senior Expert Future Mobility at Bosch | November 7, 2018 |
| Interview 11 | Expert at Ministry of Transport Baden-Württemberg, Division Electric Mobility and Vehicle Innovation | December 19, 2017 |
| Interview 12 | Project Manager at Sustainable Mobility Department of the City of Stuttgart | April 23, 2019 |
| Interview 13 | Local politician from Social Democratic Party (SPD) | July 14, 2018 |
